# Supplementary material for: Nicotine exacerbates atherosclerosis through a macrophage-mediated endothelial injury pathway
Source: publisher site journal article supplement (doi:10.18632/aging.202660), 2021-02-24
Supplement: Supplementary file [file aging-v13i5-202660-supplementary-material-SD1.pdf]

## SUPPLEMENTARY FIGURE

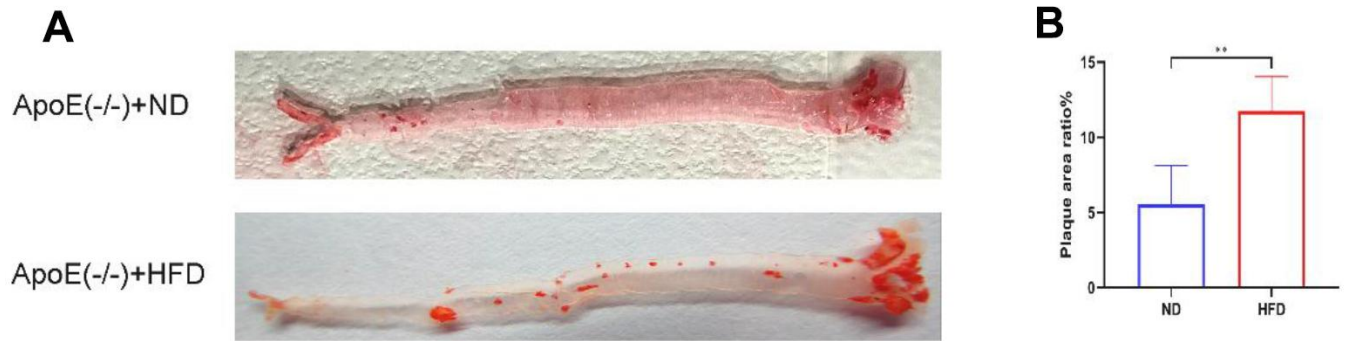

**Supplementary Figure 1. (A, B)** Atherosclerotic lesion areas in aorta of ApoE<sup>-/-</sup> mice fed with HFD and normal diet. ApoE<sup>-/-</sup> mice were administrated with HFD mentioned in manuscript and normal diet (ND,4% fat) for 12 weeks. Oil Red O staining in longitudinal-section of aorta of ApoE<sup>-/-</sup> mice was carried out. The result demonstrated that atherosclerotic lesion areas in aorta of ApoE<sup>-/-</sup> mice fed with HFD was larger than that of ApoE<sup>-/-</sup> mice fed with ND(P=0.004).
