# Supplementary material for: Nicotine exacerbates atherosclerosis through a macrophage-mediated endothelial injury pathway
Source: publisher site journal article supplement (doi:10.18632/aging.202660), 2021-02-24
Supplement: Supplementary file [file aging-v13i5-202660-supplementary-material-SD2.pdf]

## SUPPLEMENTARY TABLE

**Supplementary Table 1. Primer sequences.**

---

|                |                         |
|----------------|-------------------------|
| TXNIP(Human):  |                         |
| Forward Primer | TGTGTGAAGTTACTCGTGTCAAA |
| Reverse Primer | GCAGGTACTCCGAAGTCTGT    |
| GAPDH(Human):  |                         |
| Forward Primer | TGTGGGCATCAATGGATTTGG   |
| Reverse Primer | ACACCATGTATTCCGGGTCAAT  |

---
